# Supplementary material
Source: MDPI journal article supplement (https://www.mdpi.com/1996-1073/6/10/5003)
Supplement: s1 [file s1]

*Correction*

**Palazzi, E.; Currò, F.; Fabiano, B. Accidental Continuous Releases from Coal Processing in Semi-Confined Environment. *Energies* 2013, 6, 5003–5022**

**Emilio Palazzi, Fabio Currò and Bruno Fabiano \***

DICCA Civil, Chemical and Environmental Engineering Department, University of Genoa, Via all'Opera Pia 15, Genoa I-16145, Italy; E-Mails: emilio.palazzi@unige.it (E.P.); fabio.curro@unige.it (F.C.)

\* Author to whom correspondence should be addressed; E-Mail: brown@unige.it; Tel.: +39-010-353-2585; Fax: +39-010-353-2586.

*Received: 21 January 2014 / Accepted: 22 January 2014 / Published: 12 February 2014*

---

The authors wish to make the following corrections, due to typographical errors, to this paper [1].

On page 5007, line 17, the sentence "...for which the threshold value is 0.2 Pa" should be "...for which the threshold value is 0.2 bar". Line 19, Equation 1 should be changed from

$$p_e - p_0 = \Delta p \leq \Delta p^* = 0.07 \text{ Pa} \quad (1)$$

to

$$p_e - p_0 = \Delta p \leq \Delta p^* = 0.07 \text{ bar} \quad (1)$$

The authors would like to apologize for any inconvenience caused to the readers by these changes.

**Reference**

1. Palazzi, E.; Currò, F.; Fabiano, B. Accidental continuous releases from coal processing in semi-confined environment. *Energies* **2013**, *6*, 5003–5022.

© 2014 by the authors; licensee MDPI, Basel, Switzerland. This article is an open access article distributed under the terms and conditions of the Creative Commons Attribution license (<http://creativecommons.org/licenses/by/3.0/>).
